# Supplementary material for: Identifying innovations produced by primary health care centers and evaluating their scalability: the SPRINT Occitanie cross-sectional study in France
Source: Research Square preprint supplement (doi:10.21203/rs.3.rs-4045615/v1), 2024-03-15
Supplement: Supplementary file 1 [file 294c64901da0e04324a500c6.xlsx]

## Sheet: FRENCH
ID réponse	MSP	Nom Innovation	Type d'innovation	Score scalabilité	Niveau scalabilité	Evaluation THEORIE	Evaluation IMPACT						Evaluation COUVERTURE							Evaluation COUT
						Développer avec une théorie	Acceptabilité	Faisabilité	Appropriation	Efficacité expérimentale	Efficacité réelle	Résultats documentés	Portée	Adoption	Fidélité	Pérennisation	Implémentation dans un contexte comparable comparable	Compatibilité avec interventions similaires dans le même contexte	Compatible avec les politiques du contexte	Rapport Coûts efficacité	Ressources financières et humaines pour scalabiliser
64	MSPU Avicenne	MO(I)S SANS TABAC MSPU AVICENNE	PROGRAMME	13	FORT	Oui	Oui	Oui	Oui	Non	Oui	Oui	Oui	Oui	Oui	Oui	Oui	Non	Oui	Non	Oui
216	MSP Multi-sites du secteur de Pont-Saint-Esprit	EVALUATION INFIRMIÈRE AU LIT DU PATIENT	SERVICE	13	FORT	Oui	Oui	Oui	Non	Oui	Oui	Oui	Oui	Non	Oui	Oui	Oui	Oui	Oui	Non	Oui
208	MSP SISA SANTE GIGEAN	PARCOURS TND MIS EN PLACE SUR GIGEAN	PROGRAMME	12	FORT	Oui	Oui	Oui	Oui	Oui	Oui	Oui	En cours d'évaluation	Oui	Oui	Oui	Non	Oui	Oui	Non	Non
59	MSPU Avicenne	SOINS PRIMAIRES ENVIRONNEMENT ET SANTÉ	OUTIL	11	FORT	Oui	Oui	Oui	Oui	Oui	Non	Oui	Oui	Non	Oui	Oui	Non	Non	Oui	Non	Oui
62	MSPU Avicenne	PATIENT TRACEUR – IDE LIBÉRALES DE COORDINATION EN CANCÉROLOGIE	OUTIL	11	FORT	Oui	Oui	Oui	Non	Non	Oui	Oui	Oui	Oui	Oui	Oui	Non	Non	Oui	Non	Oui
29	MSP SAINT JUST / BÉNOVIE	TÉLÉCONSULTATION	PROGRAMME	10	FORT	Non	Oui	Oui	Oui	Oui	Oui	Non prévu	Non	Oui	Oui	Non	Non	Non	Oui	Oui	Oui
67	MSPU Avicenne	PROGRAMME MSPU AVICENNE	PROGRAMME	10	FORT	Non	Oui	Oui	Oui	Non	Oui	Oui	Oui	Oui	Oui	Oui	Non	Non	Non prévu	Non	Oui
204	MSP Val de Cèze	PROJET PLURIPARTITE DE MÉDIATION EN SANTÉ	PROGRAMME	10	FORT	Non	Oui	Oui	Oui	Non	Oui	Oui	Non	Oui	Oui	En cours d'évaluation	En cours d'évaluation	Oui	Oui	Non	Oui
221	MSPU La Providence	CAPA-CITY	INSTRUMENT	10	FORT	Oui	Oui	Oui	Non	Non	Oui	En cours d'évaluation	Oui	Oui	Oui	Oui	Oui	Non	Non	Non	Oui
60	MSPU Avicenne	PARCOURS DE SOINS BRONCHOPNEUMOPATHIE CHRONIQUE OBSTRUCTIVE	OUTIL	9	MOYEN	Oui	Oui	Oui	Non	Non	En cours d'évaluation	En cours d'évaluation	Oui	Oui	En cours d'évaluation	Oui	Non	Oui	Oui	Non	Oui
253	MSP Val de Cèze	ORDONNANCE PSYCHOLOGUE	SERVICE	9	MOYEN	Non	Oui	Oui	Non	Non	Oui	Non prévu	Oui	Oui	Oui	Oui	Non prévu	Non	Oui	Non	Oui
58	MSP Médicarrée	ATELIERS "RÉCIT DE VIE"	OUTIL	8	MOYEN	Oui	Oui	Oui	Oui	Oui	Oui	Oui	Non	Non	Non	Non	Non	Non	Non	Non	Oui
61	MSPU Avicenne	PRISE EN CHARGE PLURIPROFESSIONNELLE EN MSP DES TROUBLES DU SPECTRE AUTISTIQUE	OUTIL	8	MOYEN	Oui	Oui	Non	Non	Non	Oui	Oui	Oui	Oui	Non	Non	Non	Non	Oui	Non	Oui
68	MSPU Avicenne	ORGANISATION COVID-19 PERPIGNAN	POLITIQUE	7	MOYEN	Non	Non	Oui	Non	Non	Non	Oui	Non prévu	Non prévu	Non prévu	Oui	Oui	Oui	Oui	Non	Oui
133	MSP Collet Pont Vialas( 48)	INTRODUCTION D'UN TRAVAILLEUR SOCIAL DANS L'ÉQUIPE MÉDICALE DE LA MSP	SERVICE	7	MOYEN	Oui	Oui	En cours d'évaluation	En cours d'évaluation	Oui	Oui	Oui	Non	Oui	Non	Non	Non	Non	Oui	Non	En cours d'évaluation
228	MSPU LA SOURCE	LE COVID AVANT LES CENTRES	POLITIQUE	7	MOYEN	Oui	Oui	Non	Non	Non	Oui	Non	Non	Oui	Oui	Oui	Oui	Non	Non	Non	Non
226	MSPU LA SOURCE	ECORESPONSABILITE DU CABINET	PROGRAMME	6	MOYEN	Non	Oui	Non	Oui	Non prévu	Non prévu	Non	Oui	Oui	Oui	Non prévu	Non	Non	Oui	Non	Non
167	Maison de Santé Axone de Pézenas	PRISE EN CHARGE DES CONSULTATIONS NON CONVENTIONNÉES	OUTIL	5	MOYEN	Oui	En cours d'évaluation	Oui	Non prévu	Non	Non	Non	Oui	Oui	En cours d'évaluation	Non	Non	Non	Oui	Non	Non
219	MSPU LA SOURCE	CERCLE DES THESARDS EN MSPU	SERVICE	5	MOYEN	Oui	Non prévu	Oui	Non prévu	Non	Non	Non	Oui	Oui	Non	Oui	Non	Non	Non	Non	Non
152	MSP CIRQUE ROMAIN	MISE EN PLACE ATELIERS DIÉTÉTIQUES ET SÉANCES DE SPORT POUR ADULTES DIABÉTIQUES ET ADOLESCENTS EN SURPOIDS	PROGRAMME	4	MOYEN	Sans Objet	En cours d'évaluation	Oui	Non	Non	En cours d'évaluation	En cours d'évaluation	Non	Non	Oui	Non	Oui	En cours d'évaluation	Oui	Non	Non
215	MSP multi-sites du secteur de Pont-Saint-Esprit (SISA PSE Santé)	RENFORT INFIRMIER SOINS NON PROGRAMMÉS	SERVICE	4	MOYEN	En cours d'évaluation	Oui	En cours d'évaluation	Non prévu	Non	Non prévu	Non	Oui	Non	Sans objet	Sans objet	Sans objet	Non prévu	Oui	Non	Oui
66	MSPU Avicenne	PACTE CARTOGRAPHIQUE TERRITORIAL DE SANTÉ) RUSCINO	OUTIL	3	FAIBLE	Non	Non prévu	En cours d'évaluation	Non	Non	Non	En cours d'évaluation	Oui	Oui	Non	Non	Non	Non prévu	Non	Non	Oui
70	MSPU Avicenne	INCUBATEUR MSP	OUTIL	3	FAIBLE	Non	Non prévu	Non prévu	Non prévu	Non prévu	Oui	Non	Non prévu	Non prévu	Non prévu	Non prévu	Non prévu	Non prévu	Oui	Non	Oui
225	MSPU LA SOURCE	PARTENARIAT SOCIAL	PROGRAMME	3	FAIBLE	Non	Non prévu	Non prévu	Non prévu	Non	Non	Non	Oui	Sans objet	Oui	Non	Non	Non	Oui	Sans objet	Sans objet
227	MSPU LA SOURCE	COOPÉRATION MG/ORTHOPTISTE	PROGRAMME	3	FAIBLE	Oui	Non	Non	Non	Non	Non	Non	Non	Oui	Non	Non	Non	Non	Non	Non	Oui
54	MSP Nailloux - St Léon	PROGRAMME DOLOC	PROGRAMME	2	FAIBLE	Non	Non	Non	Non	Non	Non	Non	En cours d'évaluation	Non	Non	Non	Non	Non	Oui	Non	Oui
65	MSPU Avicenne	SOINS PRIMAIRES INNOVATIONS ET TERRITOIRES	SERVICE	2	FAIBLE	Oui	En cours d'évaluation	En cours d'évaluation	En cours d'évaluation	Non	En cours d'évaluation	En cours d'évaluation	En cours d'évaluation	En cours d'évaluation	Non prévu	Non	Non	Non	Oui	Non prévu	Non prévu
92	MSP jacques coeur port marianne	PROTOCOLE SPORT SANTÉ	SERVICE	2	FAIBLE	Oui	Non	Non	Non	Non	Non	Non	Non	Non	Non	Non	Non	Non	Oui	Non	Non
178	Maison de Santé du Bassin de la Save	PARCOURS DE SOINS DES PATIENTES EN DEMANDE D'IVG	SERVICE	2	FAIBLE	Non	En cours d'évaluation	Non prévu	Non prévu	Non	En cours d'évaluation	Non	Non	Non	Non	En cours d'évaluation	Oui	Non	Oui	Non	Non
210	MSP les Beaux Arts	PARCOURS INSUFFISANCE CARDIAQUE	PROGRAMME	2	FAIBLE	Non	En cours d'évaluation	En cours d'évaluation	Non	Non prévu	Oui	En cours d'évaluation	En cours d'évaluation	En cours d'évaluation	Non	Non	Non prévu	En cours d'évaluation	Oui	Non prévu	Non prévu
24	Msp CALYPSO	MARCHE THÉRAPEUTIQUE	SERVICE	1	FAIBLE	Non	Non	Non	Non	Non	Non	Oui	Non	Non	Non	Non	Non	Non	Non	Non	Non
63	MSPU Avicenne	INTEGRATED CARE FOR OLDER PEOPLE MSPU AVICENNE	APPROCHE	1	FAIBLE	Oui	Non	Non	Non	Non	Non	Non	Non	Non	Non	Non	Non	Non	Non	Non	Non
96	MSP Mende	PODCAST EN SANTÉ	ALGORITHME	1	FAIBLE	Non	Non	Non	Non	Sans objet	Sans objet	Sans objet	Sans objet	Sans objet	Sans objet	Sans objet	Sans objet	Oui	Non	Non	Non prévu
169	MSP Mende	ESCAPE GAME WEDA	SERVICE	1	FAIBLE	Oui	Non	En cours d'évaluation	Non	Non	En cours d'évaluation	En cours d'évaluation	Sans objet	Sans objet	Sans objet	En cours d'évaluation	Non	En cours d'évaluation	Sans objet	Non	Non
56	MSPU Pauline Lautaud	ANNUAIRE INTERNE DES RESSOURCES APRÈS LE REPÉRAGE DE FEMMES ENCEINTES VULNÉRABLES	OUTIL	0	FAIBLE	Sans Objet	Non	Non	Non	Non	Non	Non	Non	Non	Non	Non	Non	Non	Non	Non	Sans objet

## Sheet: ENGLISH
Answer ID	PHC	Name of Innovation	Type of innovation	Scalabily score	Scalability level	THEORIE	IMPACT						SETTING AND COVERAGE							COST
						Developped with theory	Acceptability	Feasability	Appropriation	Experimental efficiency	Real efficiency	Documented Results	Reach	Adoption	Fidelity	Sustainability	Implemented in setting comparable to target setting	Compatibility with similar innovations in target settings	Consistency with policy directives	Cost-effectiveness	Resources needed for the scaling up
64	Avicenne (University PHC)	A month without tabacco	Program	13	HIGH	Yes	Yes	Yes	Yes	No	Yes	Yes	Yes	Yes	Yes	Yes	Yes	No	Yes	No	Yes
216	Pont St Esprit	Bedside nursing assessment	Service	13	HIGH	Yes	Yes	Yes	No	Yes	Yes	Yes	Yes	No	Yes	Yes	Yes	Yes	Yes	No	Yes
208	Gigean	Neurodevelopmental disorders pathway	Program	12	HIGH	Yes	Yes	Yes	Yes	Yes	Yes	Yes	Under evaluation	Yes	Yes	Yes	No	Yes	Yes	No	No
59	Avicenne (University PHC)	Primaryhealtcare and environmental health	Tool	11	HIGH	Yes	Yes	Yes	Yes	Yes	No	Yes	Yes	No	Yes	Yes	No	No	Yes	No	Yes
62	Avicenne (University PHC)	Nursing cancer patient tracer	Tool	11	HIGH	Yes	Yes	Yes	No	No	Yes	Yes	Yes	Yes	Yes	Yes	No	No	Yes	No	Yes
29	Saint Just	Teleconsultation	Program	10	HIGH	No	Yes	Yes	Yes	Yes	Yes	Not foreseen	No	Yes	Yes	No	No	No	Yes	Yes	Yes
67	Avicenne (University PHC)	PHC program	Program	10	HIGH	No	Yes	Yes	Yes	No	Yes	Yes	Yes	Yes	Yes	Yes	No	No	Not foreseen	No	Yes
204	Val de Cèze	Multiparty health mediation	Program	10	HIGH	No	Yes	Yes	Yes	No	Yes	Yes	No	Yes	Yes	Under evaluation	Under evaluation	Yes	Yes	No	Yes
221	La Providence (University PHC)	CAPA-CITY	Instrument	10	HIGH	Yes	Yes	Yes	No	No	Yes	Under evaluation	Yes	Yes	Yes	Yes	Yes	No	No	No	Yes
60	Avicenne (University PHC)	COPD pathway	Tool	9	MEDIUM	Yes	Yes	Yes	No	No	Under evaluation	Under evaluation	Yes	Yes	Under evaluation	Yes	No	Yes	Yes	No	Yes
253	Val de Cèze	psychologist prescription	Service	9	MEDIUM	No	Yes	Yes	No	No	Yes	Not foreseen	Yes	Yes	Yes	Yes	Not foreseen	No	Yes	No	Yes
58	Médicarrée	life sotry workshop	Tool	8	MEDIUM	Yes	Yes	Yes	Yes	Yes	Yes	Yes	No	No	No	No	No	No	No	No	Yes
61	Avicenne (University PHC)	Autism spectrum disorder tool	Tool	8	MEDIUM	Yes	Yes	No	No	No	Yes	Yes	Yes	Yes	No	No	No	No	Yes	No	Yes
68	Avicenne (University PHC)	Covid Orgnization in Perpignan	Policy	7	MEDIUM	No	No	Yes	No	No	No	Yes	Not foreseen	Not foreseen	Not foreseen	Yes	Yes	Yes	Yes	No	Yes
133	Collet Vialas	Introduction of a social worker in PHC team	Service	7	MEDIUM	Yes	Yes	Under evaluation	Under evaluation	Yes	Yes	Yes	No	Yes	No	No	No	No	Yes	No	Under evaluation
228	La Source (University PHC)	Covid policy before covid center	Policy	7	MEDIUM	Yes	Yes	No	No	No	Yes	No	No	Yes	Yes	Yes	Yes	No	No	No	No
226	La Source (University PHC)	Ecoresponsability at the practice	Program	6	MEDIUM	No	Yes	No	Yes	Not foreseen	Not foreseen	No	Yes	Yes	Yes	Not foreseen	No	No	Yes	No	No
167	Pézenas	Reimbursement of non-standard consultations	Tool	5	MEDIUM	Yes	Under evaluation	Yes	Not foreseen	No	No	No	Yes	Yes	Under evaluation	No	No	No	Yes	No	No
219	La Source (University PHC)	Thesards cercle	Service	5	MEDIUM	Yes	Not foreseen	Yes	Not foreseen	No	No	No	Yes	Yes	No	Yes	No	No	No	No	No
152	Cirque Romain	Sdietary and sports workshops for diabetic patients and overweight adolescents	Program	4	MEDIUM	Not applicable	Under evaluation	Yes	No	No	Under evaluation	Under evaluation	No	No	Yes	No	Yes	Under evaluation	Yes	No	No
215	Pont St Esprit	Back-up nursing for unscheduled care	Service	4	MEDIUM	Under evaluation	Yes	Under evaluation	Not foreseen	No	Not foreseen	No	Yes	No	Not applicable	Not applicable	Not applicable	Not foreseen	Yes	No	Yes
66	Avicenne (University PHC)	Territorial health mapping pact	Tool	3	LOW	No	Not foreseen	Under evaluation	No	No	No	Under evaluation	Yes	Yes	No	No	No	Not foreseen	No	No	Yes
70	Avicenne (University PHC)	PHC incubator	Tool	3	LOW	No	Not foreseen	Not foreseen	Not foreseen	Not foreseen	Yes	No	Not foreseen	Not foreseen	Not foreseen	Not foreseen	Not foreseen	Not foreseen	Yes	No	Yes
225	La Source (University PHC)	Social partnership	Program	3	LOW	No	Not foreseen	Not foreseen	Not foreseen	No	No	No	Yes	Not applicable	Yes	No	No	No	Yes	Not applicable	Not applicable
227	La Source (University PHC)	Speech therapist coordination	Program	3	LOW	Yes	No	No	No	No	No	No	No	Yes	No	No	No	No	No	No	Yes
54	Nailloux	DOLOC program	Program	2	LOW	No	No	No	No	No	No	No	Under evaluation	No	No	No	No	No	Yes	No	Yes
65	Avicenne (University PHC)	SPRINT service	Service	2	LOW	Yes	Under evaluation	Under evaluation	Under evaluation	No	Under evaluation	Under evaluation	Under evaluation	Under evaluation	Not foreseen	No	No	No	Yes	Not foreseen	Not foreseen
92	Port Marianne	Health-sport service	Service	2	LOW	Yes	No	No	No	No	No	No	No	No	No	No	No	No	Yes	No	No
178	Bassin de la Save	Abortion pathway	Service	2	LOW	No	Under evaluation	Not foreseen	Not foreseen	No	Under evaluation	No	No	No	No	Under evaluation	Yes	No	Yes	No	No
210	Les Beaux Art	Heart failure pathway	Program	2	LOW	No	Under evaluation	Under evaluation	No	Not foreseen	Yes	Under evaluation	Under evaluation	Under evaluation	No	No	Not foreseen	Under evaluation	Yes	Not foreseen	Not foreseen
24	Calypso	Theurapeutic walk	Service	1	LOW	No	No	No	No	No	No	Yes	No	No	No	No	No	No	No	No	No
63	Avicenne (University PHC)	ICOPE aproach	Approach	1	LOW	Yes	No	No	No	No	No	No	No	No	No	No	No	No	No	No	No
96	Mende	INTEGRATED CARE FOR OLDER PEOPLE MSPU AVICENNE	Algorithm	1	LOW	No	No	No	No	Not applicable	Not applicable	Not applicable	Not applicable	Not applicable	Not applicable	Not applicable	Not applicable	Yes	No	No	Not foreseen
169	Mende	Weda escape game	Service	1	LOW	Yes	No	Under evaluation	No	No	Under evaluation	Under evaluation	Not applicable	Not applicable	Not applicable	Under evaluation	No	Under evaluation	Not applicable	No	No
56	Pauline Lautaud (University PHC)	Internal ressources following the identification of vulnerable pregnant women	Tool	0	LOW	Not applicable	No	No	No	No	No	No	No	No	No	No	No	No	No	No	Not applicable
